# Supplementary material
Source: publisher figshare collection journal article supplement (https://aacr.figshare.com/articles/dataset/_/22758779)
Supplement: Supplementary file 1 [file 40438163]

**Figure S2 A**

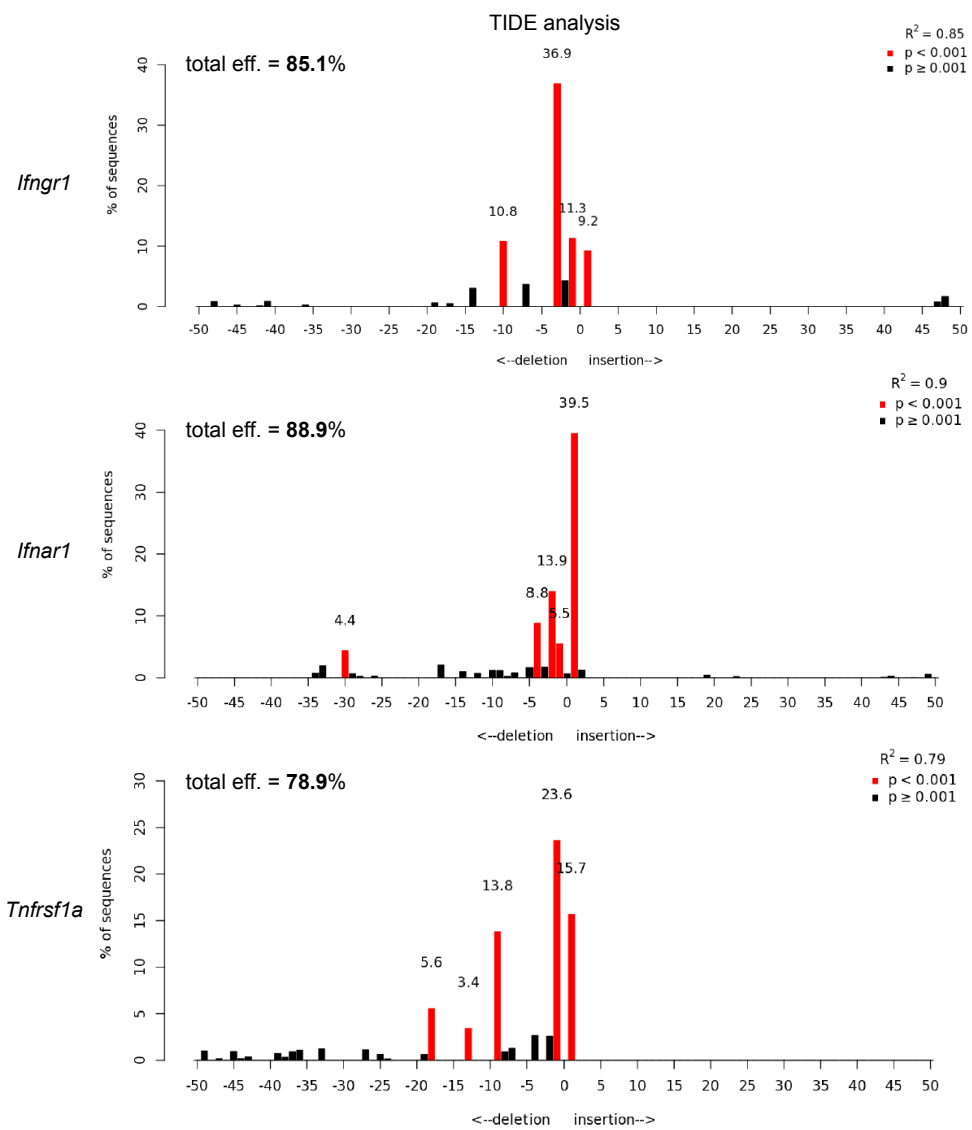

**B**

Summary of TIDE analysis

|                    | Control | <i>Ifngr1</i> | <i>Ifnar1</i> | <i>Tnfrsf1a</i> | <i>Fas</i> | <i>Gne</i> |
|--------------------|---------|---------------|---------------|-----------------|------------|------------|
| Editing efficiency | 95.2%   | 85.1%         | 88.9%         | 78.9%           | 95.4%      | 98.2%      |

**C**

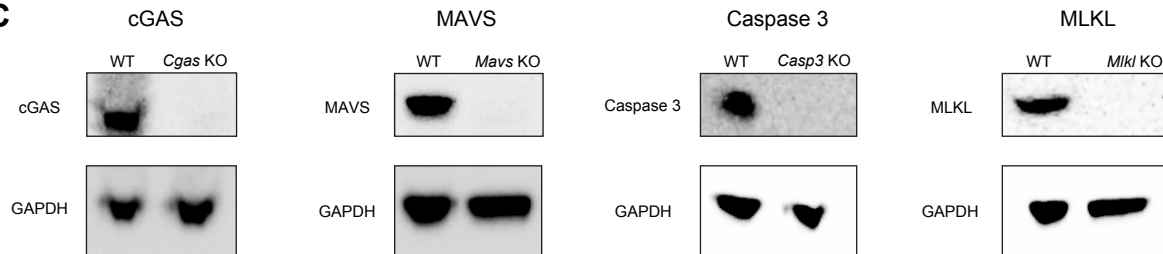

**D**

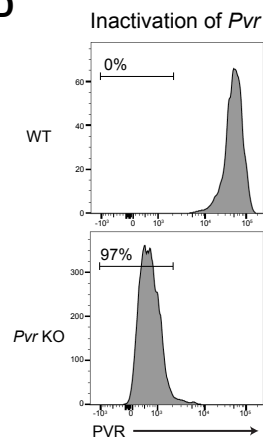

**E**

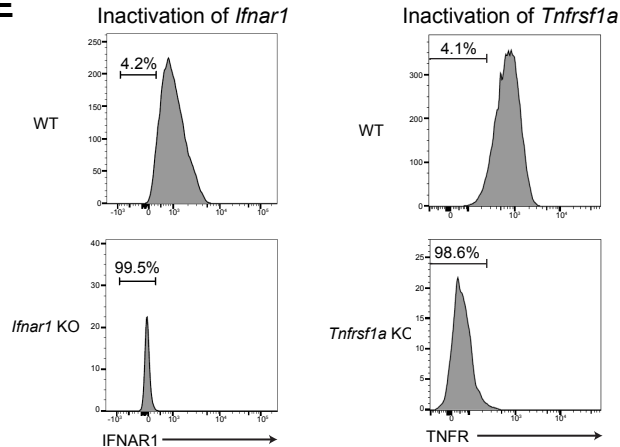

**Supplementary Fig. S2. Efficiency of gene editing in tumor cell lines for co-dependency screen.**

(A) TIDE analysis of *Ifngr1*, *Ifnar1*, and *Tnfrsf1a* gene editing efficiency in *Ifngr1*-KO, *Ifnar1*-KO, and *Tnfrsf1a*-KO B16F10-Cas9 cells, respectively.

(B) Summary of editing efficiency by TIDE analysis for genes edited in B16F10-Cas9 cells that were used for co-dependency screens.

(C) Western blot analysis of cell lysates from parental B16F10-Cas9 cells (WT) or indicated gene edited B16F10-Cas9 cells. GAPDH is shown as a loading control.

(D) Histogram of flow cytometry analysis for PVR expression. Parental B16F10-Cas9 cells (WT) or B16F10-Cas9 *Pvr*-KO cells were analysed.

(E) Histogram of flow cytometry analysis for IFNAR1 and TNFR expression. Parental B16F10-Cas9 cells (WT) and B16F10-Cas9 *Ifnar1*-KO cells, or B16F10-Cas9 *Tnfrsf1a*-KO cells were analysed, respectively.
